# Supplementary material
Source: PubMed Central journal article supplement (PMC8595671)

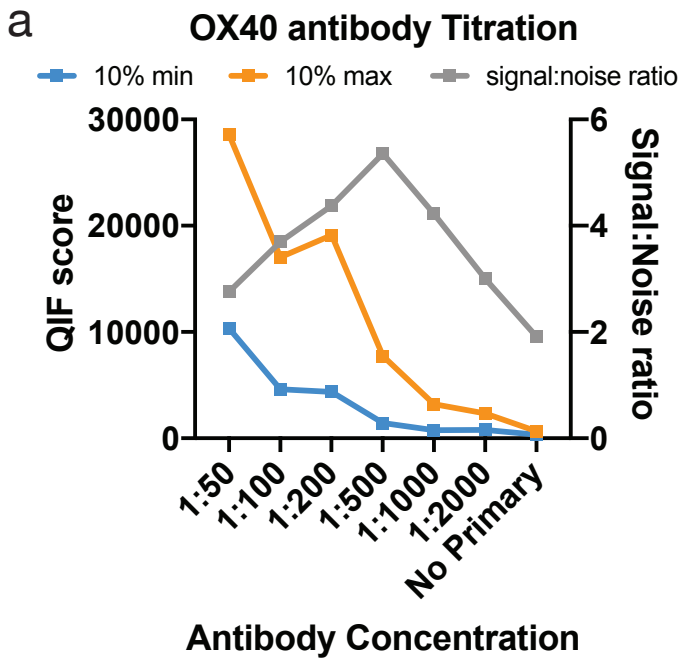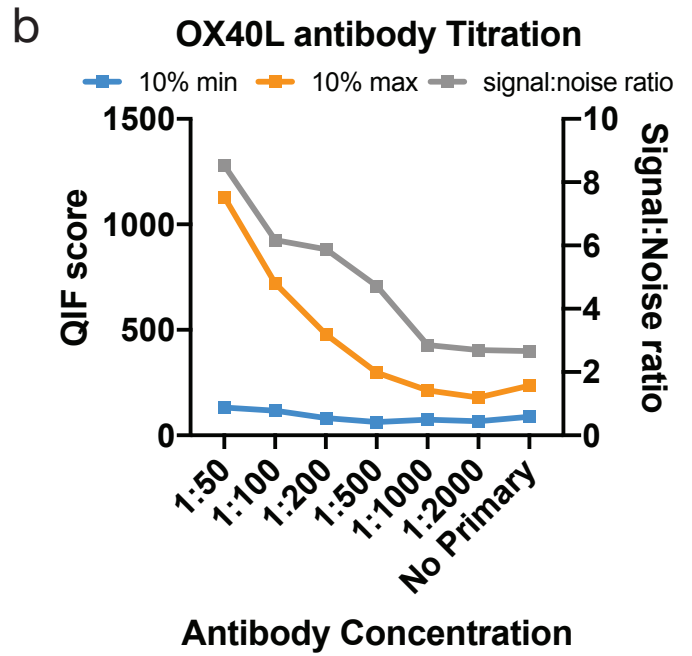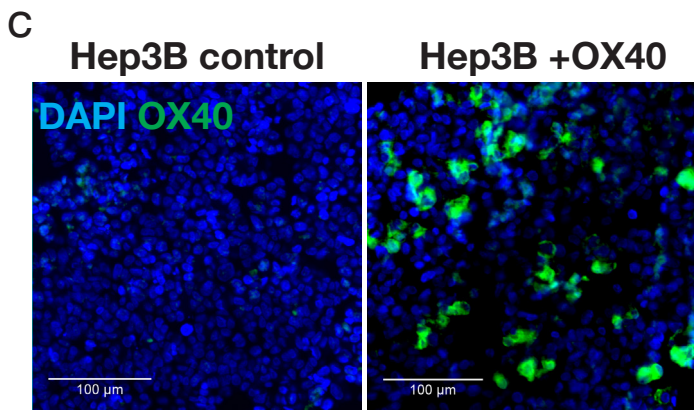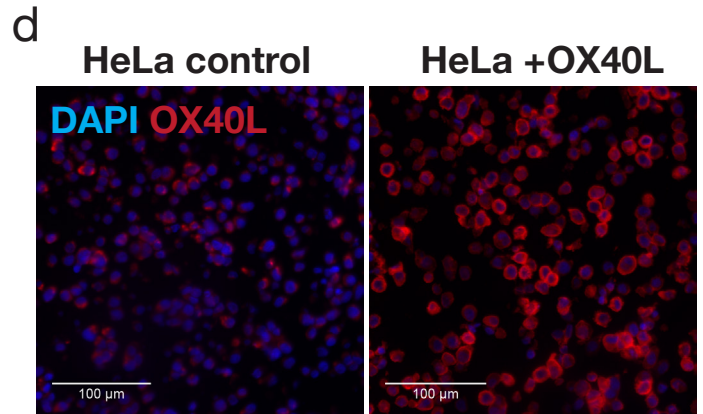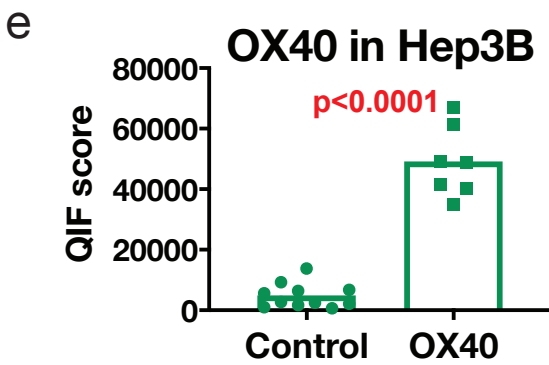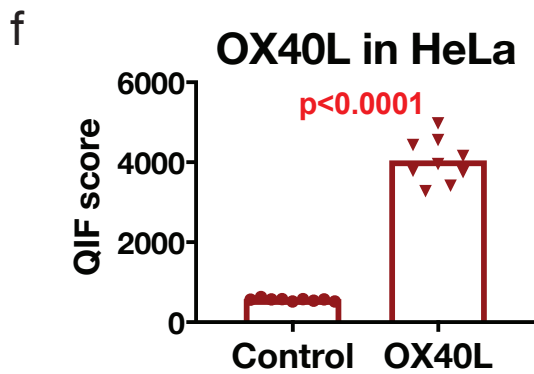

Supplement: NIHMS1741131-supplement-3.pdf [file NIHMS1741131-supplement-3.pdf]

OX40 OX40L CK DAPI

a

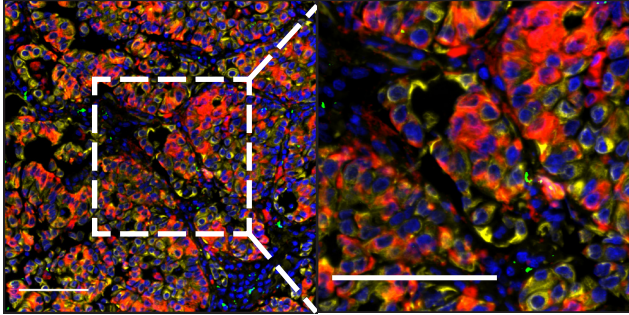

b

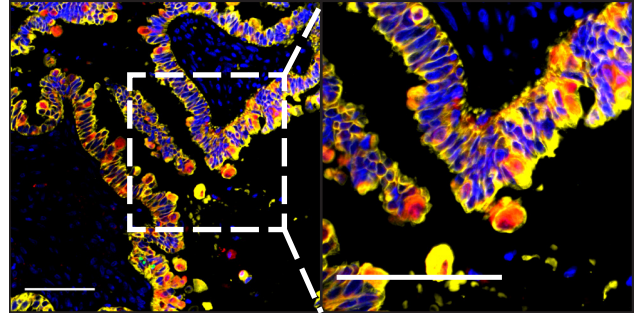

Supplement: NIHMS1741131-supplement-4.pdf [file NIHMS1741131-supplement-4.pdf]

OX40 OX40L

a

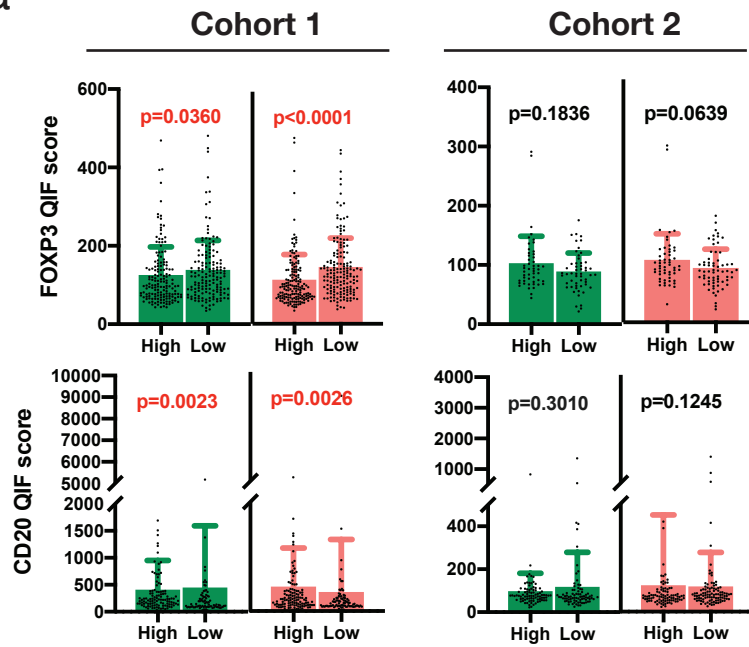

b

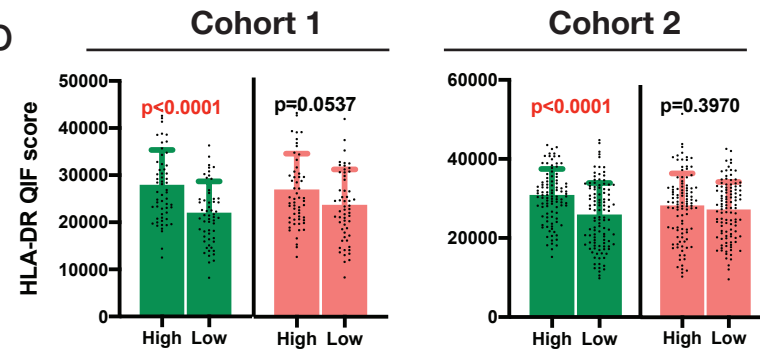

Supplement: NIHMS1741131-supplement-5.pdf [file NIHMS1741131-supplement-5.pdf]

a

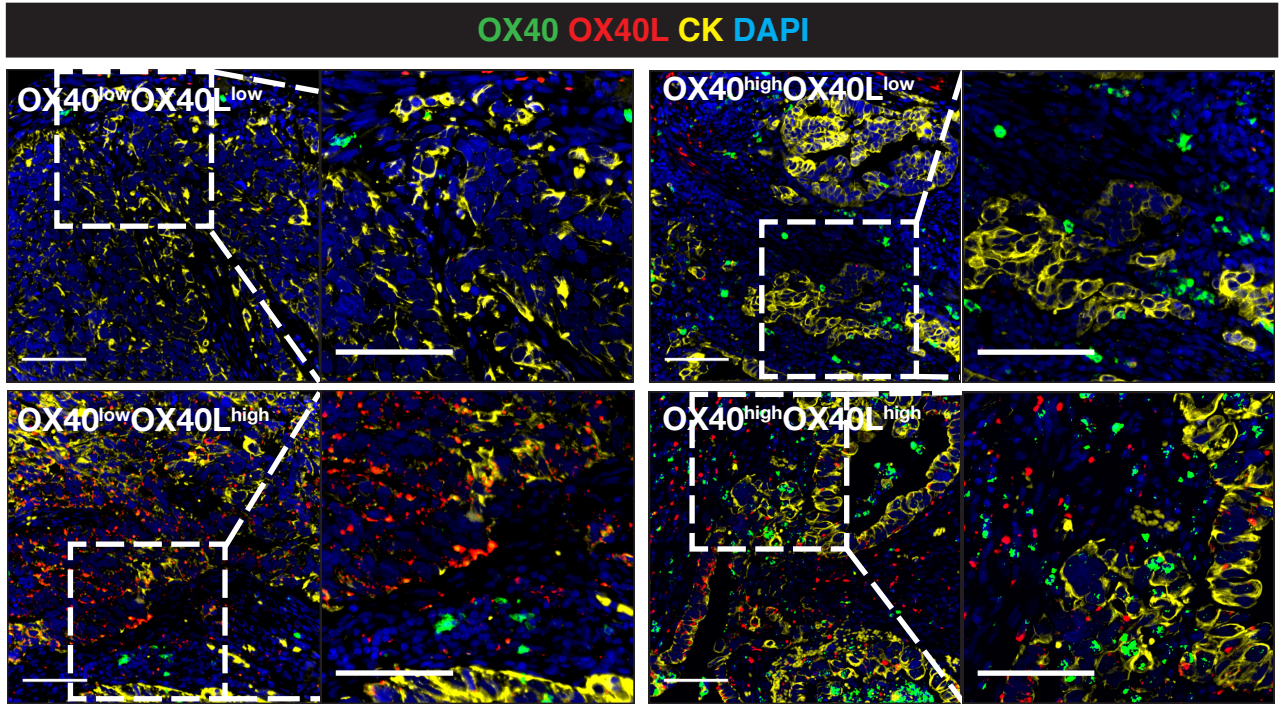

b

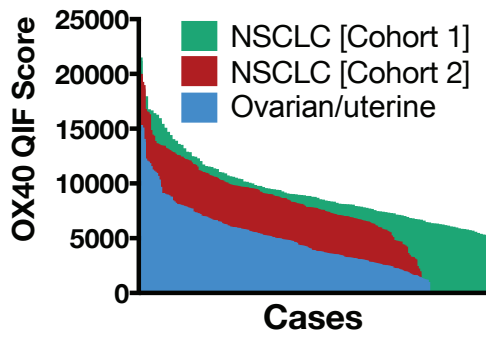

c

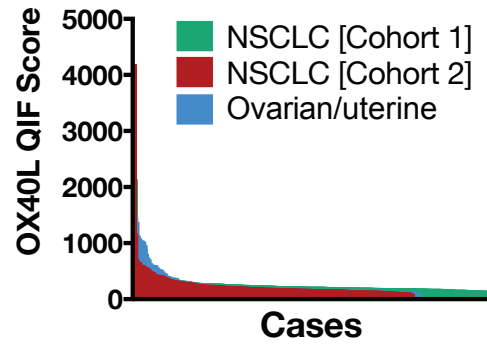

Supplement: NIHMS1741131-supplement-6.pdf [file NIHMS1741131-supplement-6.pdf]

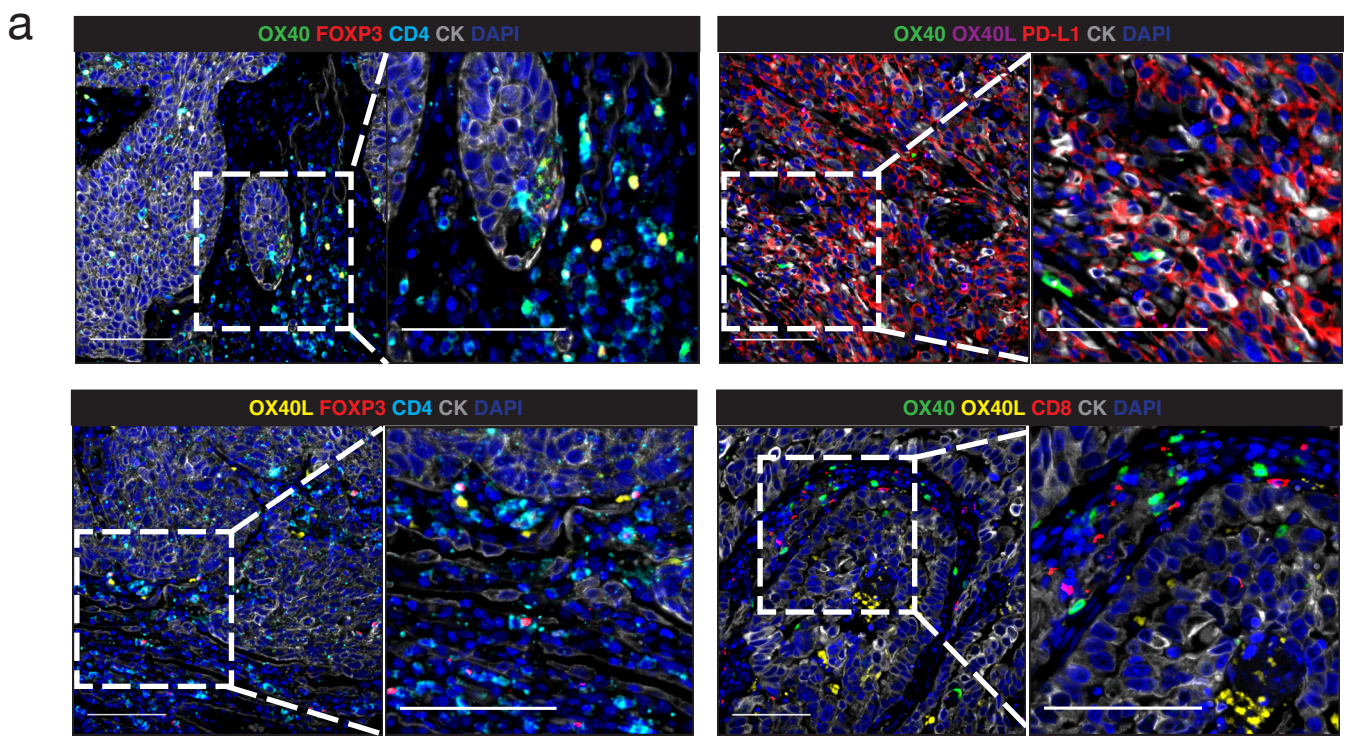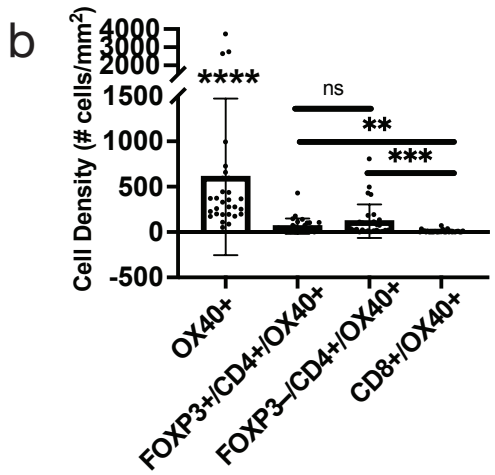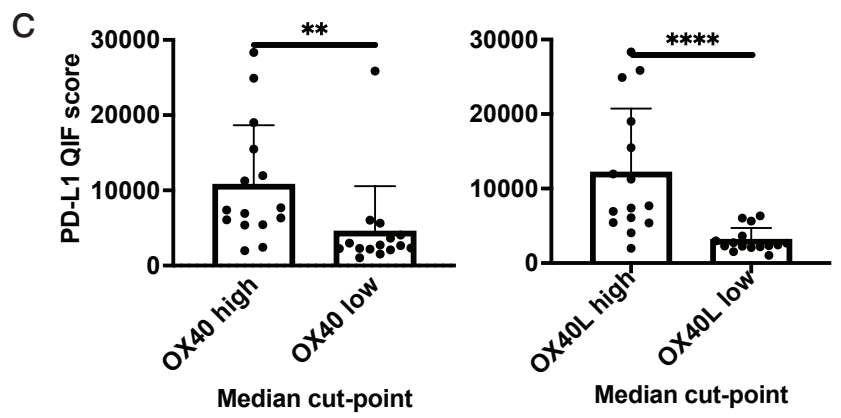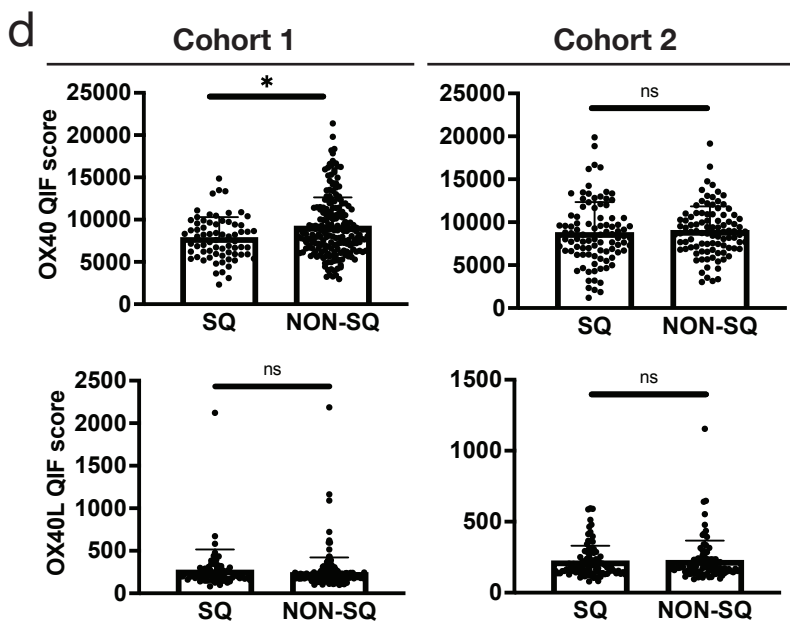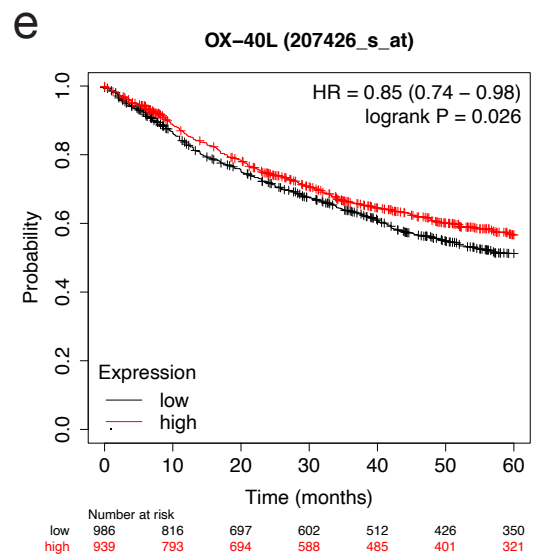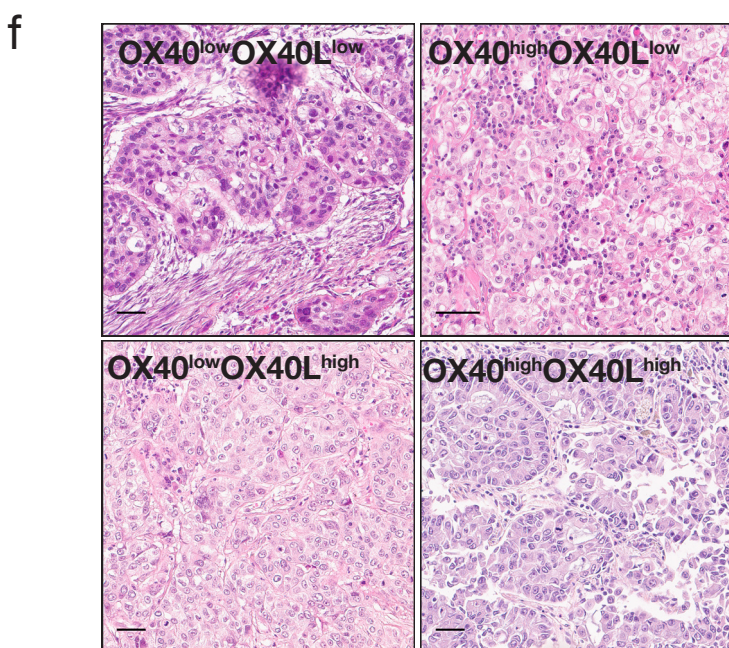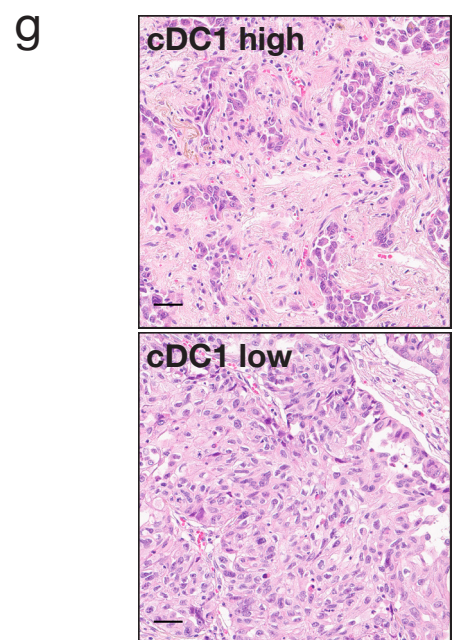

Supplement: NIHMS1741131-supplement-7.pdf [file NIHMS1741131-supplement-7.pdf]
